# Supplementary material for: An efficient photocatalyst used in a continuous flow system for hydrogen evolution from water: TiO2 nanotube arrays fabricated on Ti meshes
Source: Royal Society of Chemistry journal article supplement (doi:10.1039/c4ra12864h), 2014-12-19
Supplement: c4ra12864h1.pdf [file c4ra12864h1.pdf]

## Supplementary Data

### **An efficient photocatalyst used in a continuous flow system for hydrogen evolution from water: TiO<sub>2</sub> nanotubes arrays fabricated on Ti meshes**

Ruixue Zhou,<sup>a</sup> Shi-Zhao Kang,<sup>\*,a</sup> Xiangqing Li,<sup>a</sup> Lei Wang,<sup>b</sup> Lixia Qin,<sup>a</sup> and Jin Mu<sup>\*,a</sup>

*<sup>a</sup>School of Chemical and Environmental Engineering, Shanghai Institute of Technology, 100 Haiquan Road, Shanghai, 201418, China*

*<sup>b</sup>School of Chemistry and Molecular Engineering, East China University of Science and Technology, 130 Meilong Road, Shanghai 200237, China*

\* Corresponding author: Jin Mu and Shi-Zhao Kang, Tel./fax: +86 21 60873061.

*E-mail address:* mujin@sit.edu.cn (J. Mu) and kangsz@sit.edu.cn (S.-Z. Kang)

**Supplementary Fig. S1**

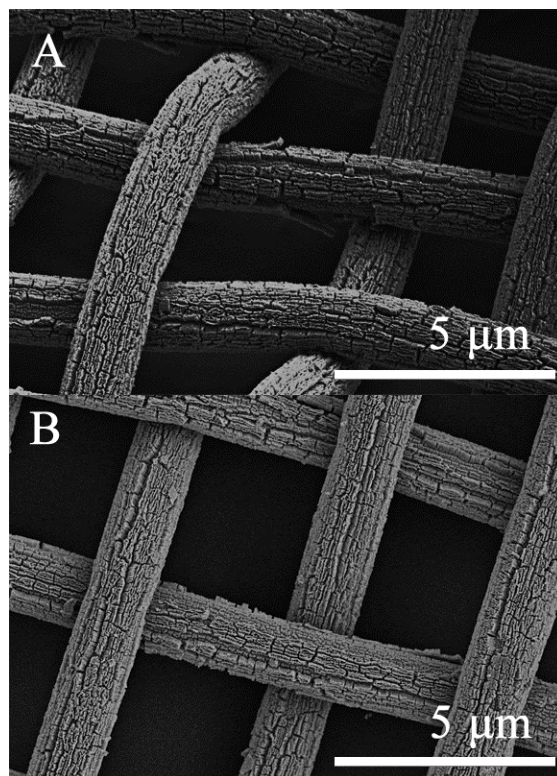

**Fig. S1.** SEM images of (A) fresh TTA-m with Pt and (B) TTA-m with Pt after used in the photocatalytic continuing flow system for 5 h (anodization duration: 90 min; annealing temperature: 450 °C; content of Pt:  $1.6 \mu\text{mol}\cdot\text{m}^{-2}$ ).
